# Supplementary material
Source: MDPI journal article supplement (https://www.mdpi.com/2311-7524/10/5/502)
Supplement: s1 [file Table S1. Primer sequences.xlsx]

## Sheet: Sheet1
Gene name	Primer sequences	function
PgPYL1	F:AATCCATCTAAGCCGCCAGG R:TGGGTATGGTACCGGGCTAA	qRT-PCR
PgPYL2	F:TCTCATCCTGTCGCACCAC R:TCCCTTATGCTCCCTACCC	qRT-PCR
PgPYL3	F:CTCAAGAAGCGGAGCAAGAAC R:GCAAGCAGGGAGGAACACC	qRT-PCR
PgPYL4	F:GAACCCCAGTGATCGAGTCC R:TCGCACACAGCAGCTAAAGA	qRT-PCR
PgPYL5	F:GACCACCGCCTTGCTAACTA R:CGCGTTTCCTCCTCGGTATT	qRT-PCR
PgPYL6	F:CGCCCACGAGTATCTTCACC R:CCTCCTTGCTGTTGTCACCC	qRT-PCR
PgPYL7	F:GTGATCCGAACGCACCATA R:GGAGAAGTCCCGCACAAAG	qRT-PCR
PgPYL8	F:CTGGTCCATAGTCCGTCGCTTC R:GCAGCCCCGATATCACATCCAC	qRT-PCR
PgPYL9	F:CACATCAAAGCTCCCGTTC R:AAGGTTTCCTCGCACGACA	qRT-PCR
PgPYL10	F:CTACGTGGTCGACATCCCAC R:TATTGCTGCTTCGGGAGAGG	qRT-PCR
PgPYL11	F:TTCTTCAATCATGACGGTCCA R:GTTGCATCTAATCAAGGCTCT	qRT-PCR
PgPYL12	F:GGGACTTCCTGCTACAACCAG R:GGTCTGCCATCAACAACCTCT	qRT-PCR
PgActin	F:AGTCCTCTTCCAGCCATCTC R:CACTGAGCACAATGTTTCCA	qRT-PCR
NtPP2C	F:TTCTTGGAGTTTTAGCCAT R:CTAATATCAAACACTCGTC	qRT-PCR
NtSnRK2	F:GTCCCTACGGCATCCTAACA R:TTGCATTGAGTGGCAGTAGC	qRT-PCR
NtAREB	F:CTAGTGGTCAATTAGGCAGTCC R:GCACCAGTTACACCTCCAG	qRT-PCR
NtActin	F:TTGCATTGAGTGGCAGTAGC R:TTGCATTGAGTGGCAGTAGC	qRT-PCR
PgPYL1	F:ATGCCTTCTTCACTACAAATCC R:CTAATGTTGTTCATTACTCTTAG	gene clone
