# Supplementary material
Source: MDPI journal article supplement (https://www.mdpi.com/2311-7524/10/5/502)
Supplement: s1 [file Table S2. Physicochemical propertiesSecondary structure and subcellular localization of PgPYL proteins.xlsx]

## Sheet: Sheet1
Gene name	Gene ID	Number of amino acid	Molecular weight/Da	Theoretical pI	Instability index	Aliphatic index	Grand average of hydropathicity	Signal peptides	Alpha-helix/No.	Extended strand/No.	Beta turn/No.	Random coil/No.	Subcellular localization
Pg PYL1	XP_031371458.1	218	23523.8	6.54	40.8	95.23	-0.032	No	37	17	6	40	Cytoplasm
Pg PYL2	XP_031371876.1	189	21087.8	5.06	35.03	87.57	-0.244	No	37	18	6	39	Cytoplasm
Pg PYL3	XP_031377967.1	221	24565.4	5.92	32.23	82.44	-0.405	No	40	17	5	38	Nucleus
Pg PYL4	XP_031378816.1	135	14776.7	5.96	40.58	94.52	-0.264	No	29	23	7	41	Chloroplast, Nucleus
Pg PYL5	XP_031379553.1	248	26917.5	6.35	44.52	88.35	-0.076	No	33	21	6	39	Cytoplasm
Pg PYL6	XP_031384686.1	190	20780.5	6.35	46.54	86.68	-0.19	No	39	19	4	38	Cytoplasm
Pg PYL7	XP_031388759.1	218	23991	5.97	30.61	90.28	-0.343	No	45	14	7	34	Cytoplasm
Pg PYL8	XP_031389511.1	228	24724.5	5.16	33.8	79.12	-0.304	No	41	14	6	38	Cytoplasm
Pg PYL9	XP_031390633.1	195	21854.7	6.06	48.37	94.87	-0.323	No	34	19	8	39	Chloroplast, Nucleus
Pg PYL10	XP_031390715.1	216	23237.1	6.02	53.99	84.26	-0.169	No	26	23	5	46	Cytoplasm
Pg PYL11	XP_031394311.1	187	21196.1	6.36	41.74	86.9	-0.409	No	36	20	6	37	Chloroplast
Pg PYL12	XP_031399032.1	185	20721.7	6.44	46.51	91.08	-0.326	No	36	18	7	39	Chloroplast
