# Supplementary material
Source: MDPI journal article supplement (https://www.mdpi.com/2311-7524/10/5/502)
Supplement: s1 [file Table S3. Information of constructing phylogenetic tree.xlsx]

## Sheet: Sheet1
species name	gene name	gene ID
Punica granatum L.	PgPYL1	XP_031371458.1
Punica granatum L.	PgPYL2	XP_031371876.1
Punica granatum L.	PgPYL3	XP_031377967.1
Punica granatum L.	PgPYL4	XP_031378816.1
Punica granatum L.	PgPYL5	XP_031379553.1
Punica granatum L.	PgPYL6	XP_031384686.1
Punica granatum L.	PgPYL7	XP_031388759.1
Punica granatum L.	PgPYL8	XP_031389511.1
Punica granatum L.	PgPYL9	XP_031390633.1
Punica granatum L.	PgPYL10	XP_031390715.1
Punica granatum L.	PgPYL11	XP_031394311.1
Punica granatum L.	PgPYL12	XP_031399032.1
Arabidopsis thaliana L.	AtPYL1	AT5G46790
Arabidopsis thaliana L.	AtPYL2	AT2G26040
Arabidopsis thaliana L.	AtPYL3	AT1G73000
Arabidopsis thaliana L.	AtPYL4	AT2G38310
Arabidopsis thaliana L.	AtPYL5	AT5G05440
Arabidopsis thaliana L.	AtPYL6	AT2G40330
Arabidopsis thaliana L.	AtPYL7	AT4G01026
Arabidopsis thaliana L.	AtPYL8	AT5G53160
Arabidopsis thaliana L.	AtPYL9	AT1G01360
Arabidopsis thaliana L.	AtPYL10	AT4G27920
Arabidopsis thaliana L.	AtPYL11	AT5G45860
Arabidopsis thaliana L.	AtPYL12	AT5G45870
Arabidopsis thaliana L.	AtPYL13	AT4G18620
Arabidopsis thaliana L.	AtPYR1	AT4G17870
Vitis vinifera L.	VvPYL1	GSVIVG01019517001
Vitis vinifera L.	VvPYL2	GSVIVG01027078001
Vitis vinifera L.	VvPYL3	GSVIVG01028704001
Vitis vinifera L.	VvPYL4	GSVIVG01032747001
Vitis vinifera L.	VvPYL5	GSVIVG01035362001
Vitis vinifera L.	VvPYL6	GSVIVG01013161001
Solanum lycopersicum L.	SlPYL2	Solyc01g068030.3.1
Solanum lycopersicum L.	SlPYL4	Solyc01g095700.3.1
Solanum lycopersicum L.	SlPYL5	Solyc02g076770.1.1
Solanum lycopersicum L.	SlPYL6	Solyc03g007310.3.1
Solanum lycopersicum L.	SlPYL8	Solyc05g005865.1.1
Solanum lycopersicum L.	SlPYL9	Solyc06g050500.2.1
Solanum lycopersicum L.	SlPYL11	Solyc08g066420.1.1
Solanum lycopersicum L.	SlPYL12	Solyc08g066430.1.1
Solanum lycopersicum L.	SlPYL13	Solyc08g076960.1.1
Solanum lycopersicum L.	SlPYL14	Solyc08g082180.3.1
Solanum lycopersicum L.	SlPYL15	Solyc09g015380.1.1
Solanum lycopersicum L.	SlPYL17	Solyc10g076410.1.1
Solanum lycopersicum L.	SlPYL18	Solyc10g085310.1.1
Solanum lycopersicum L.	SlPYL19	Solyc12g055990.2.1
Fragaria vesca L.	FvPYL1	FvH4_1g05920.1
Fragaria vesca L.	FvPYL2	FvH4_2g32040.1
Fragaria vesca L.	FvPYL3	FvH4_2g35410.1
Fragaria vesca L.	FvPYL4	FvH4_2g35420.1
Fragaria vesca L.	FvPYL5	FvH4_3g07710.1
Fragaria vesca L.	FvPYL6	FvH4_3g07720.1
Fragaria vesca L.	FvPYL7	FvH4_3g16470.1
Fragaria vesca L.	FvPYL8	FvH4_4g09440.1
Fragaria vesca L.	FvPYL9	FvH4_5g22060.1
Fragaria vesca L.	FvPYL12	FvH4_6g10740.1
Fragaria vesca L.	FvPYL13	FvH4_7g16550.1
Fragaria vesca L.	FvPYL14	FvH4_7g23970.1
Fragaria vesca L.	FvPYL15	FvH4_7g25180.1
Fragaria vesca L.	FvPYL16	FvH4_7g31130.1
