# Supplementary material
Source: MDPI journal article supplement (https://www.mdpi.com/2311-7524/10/5/502)
Supplement: s1 [file Table S4. The cis-acting eleements of PgPYLs.xlsx]

## Sheet: Sheet1
GeneID	ACE	AE-box	Sp1	ATCT-motif	Box 4	GA-motif	GATA-motif	G-box	GT1-motif	I-box	TCCC-motif	TCT-motif	MRE	MBS	LTR	ARE	GC-motif	TC-rich repeats	WUN-motif	CAT-box	MSA-like	circadian	MBSI	O2-site	ABRE	AuxRR-core	TGA-element	CGTCA-motif	TGACG-motif	GARE-motif	P-box	TATC-box	TCA-element
PgPYL1	1	1	0	0	2	1	1	1	0	1	1	0	0	3	2	7	1	0	0	2	0	2	1	0	0	1	0	2	2	0	0	0	1
PgPYL2	0	1	0	1	4	0	0	1	1	0	0	2	0	1	2	0	0	0	1	0	0	1	0	0	2	1	1	1	1	0	2	0	1
PgPYL3	0	0	0	0	1	0	1	5	0	0	1	0	1	2	1	1	0	0	0	0	1	0	0	0	3	0	1	1	1	0	0	0	0
PgPYL4	0	0	0	0	0	0	0	0	1	1	0	1	1	1	1	7	0	1	0	0	0	0	0	0	0	0	0	1	1	0	1	0	0
PgPYL5	1	0	0	0	5	0	1	2	2	0	0	0	1	1	1	2	0	2	4	0	0	0	0	1	2	0	0	1	1	0	0	0	1
PgPYL6	0	0	0	0	0	0	1	27	2	0	1	1	0	0	2	5	0	0	1	0	1	0	1	0	16	0	2	7	7	0	0	6	1
PgPYL7	0	1	0	0	4	0	1	1	2	0	1	1	1	1	1	2	0	0	2	1	0	0	1	0	0	0	0	0	0	0	0	0	1
PgPYL8	0	0	0	1	2	0	0	1	1	0	0	0	0	0	1	2	0	0	1	2	0	0	0	0	1	0	0	0	0	0	0	0	1
PgPYL9	0	0	0	0	4	0	1	2	0	0	0	0	0	0	1	3	0	1	0	1	0	2	0	1	2	0	1	4	4	1	0	0	0
PgPYL10	0	0	0	0	1	0	3	1	1	0	0	1	1	1	1	3	0	0	1	0	0	0	0	0	1	0	0	0	0	0	0	0	1
PgPYL11	0	1	1	0	2	0	0	2	1	0	0	0	0	2	1	1	2	1	0	1	0	0	0	2	2	0	1	2	2	0	0	0	2
PgPYL12	0	0	1	1	3	0	0	4	0	0	0	2	0	0	1	0	0	0	1	0	0	0	0	1	4	0	1	3	3	0	0	0	0
